# Supplementary material for: Colorimetric Paper-Based Analytical Devices (PADs) Backed by Chemometrics for Pd(II) Detection
Source: MDPI journal article supplement (doi:10.3390/s23177425), 2023-08-25
Supplement: s1 [file s1]

Supplementary Materials

Colorimetric PADs backed by chemometrics for Pd(II) detection

Giancarla Alberti, Lisa Rita Magnaghi, Marzia Iurato, Camilla Zanoni and Raffaella Biesuz

Figure S1. PLS model Pd(II)/TazoC-PADs pH 2: Model performances

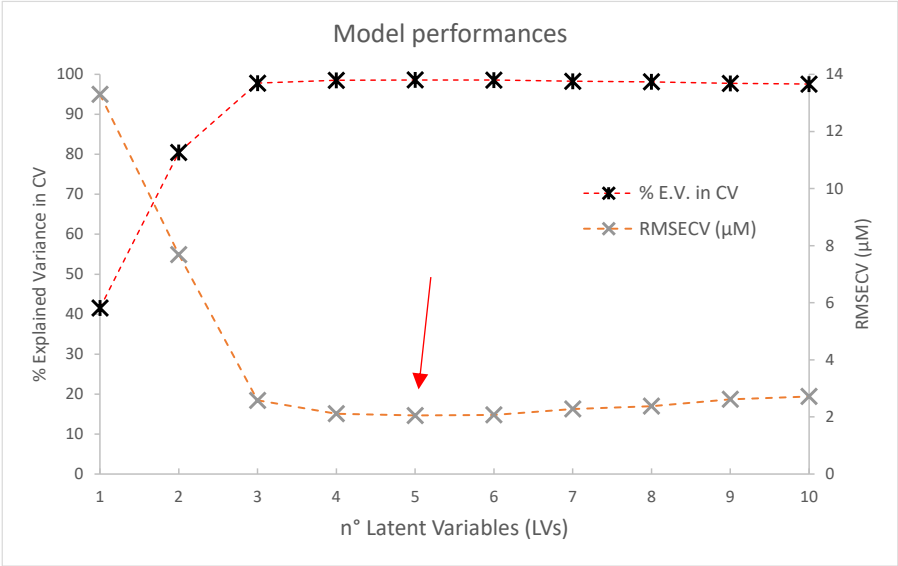

Table S1. PLS model Pd(II)/TazoC-PADs pH 2: Experimental and fitted data

| Training set |              | Test set     |              |
|--------------|--------------|--------------|--------------|
| Exp. [Pd] μM | Fit. [Pd] μM | Exp. [Pd] μM | Fit. [Pd] μM |
| 2.6          | 2.1          | 7.5          | 7.8          |
| 2.6          | 2.5          | 7.5          | 8.7          |
| 2.6          | 2.2          | 7.5          | 6.8          |
| 4.9          | 5.1          | 25.2         | 24.3         |
| 4.9          | 6.5          | 25.2         | 26.8         |
| 4.9          | 4.5          | 25.2         | 25.3         |
| 10.1         | 11.3         | 42.5         | 43.3         |
| 10.1         | 10.8         | 42.5         | 41.2         |
| 10.1         | 9.7          | 42.5         | 44.9         |
| 19.9         | 21.9         |              |              |
| 19.9         | 21.9         |              |              |
| 19.9         | 20.0         |              |              |
| 30.1         | 28.5         |              |              |
| 30.1         | 27.8         |              |              |
| 30.1         | 28.1         |              |              |
| 39.8         | 41.4         |              |              |
| 39.8         | 41.5         |              |              |
| 39.8         | 40.3         |              |              |
| 50.0         | 50.7         |              |              |
| 50.0         | 47.4         |              |              |
| 50.0         | 49.5         |              |              |

**Figure S2.** PLS model Pd(II)/TazoC-PADs pH 4: Model performances

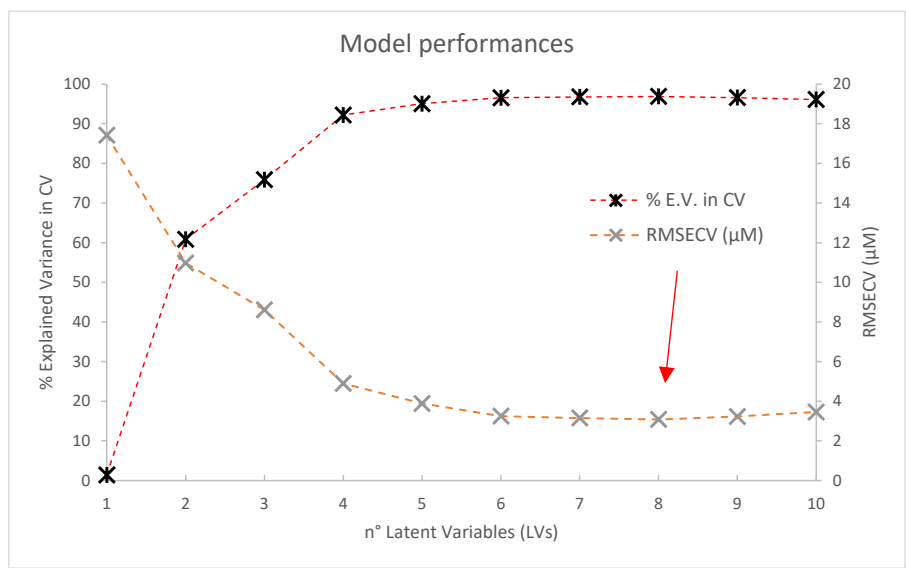

**Table S2.** PLS model Pd(II)/TazoC-PADs pH 4: Experimental and fitted data

| Training set |              | Test set     |              |
|--------------|--------------|--------------|--------------|
| Exp. [Pd] μM | Fit. [Pd] μM | Exp. [Pd] μM | Fit. [Pd] μM |
| 2.6          | 2.1          | 7.5          | 5.6          |
| 2.6          | 3.6          | 7.5          | 5.9          |
| 2.6          | 3.2          | 7.5          | 8.1          |
| 4.9          | 5.4          | 25.2         | 24.9         |
| 4.9          | 4.9          | 25.2         | 26.7         |
| 4.9          | 4.3          | 25.2         | 27.2         |
| 10.1         | 7.9          | 37.6         | 38.2         |
| 10.1         | 9.3          | 37.6         | 38.6         |
| 10.1         | 11.6         | 37.6         | 41.9         |
| 19.9         | 17.9         |              |              |
| 19.9         | 20.9         |              |              |
| 19.9         | 21.7         |              |              |
| 30.1         | 28.8         |              |              |
| 30.1         | 29.7         |              |              |
| 30.1         | 30.0         |              |              |
| 39.8         | 39.0         |              |              |
| 39.8         | 40.5         |              |              |
| 39.8         | 39.9         |              |              |
| 50.0         | 52.3         |              |              |
| 50.0         | 49.3         |              |              |
| 50.0         | 50.0         |              |              |

**Figure S3.** PLS model Pd(II)/TazoC-PADs pH 5.5: Model performances

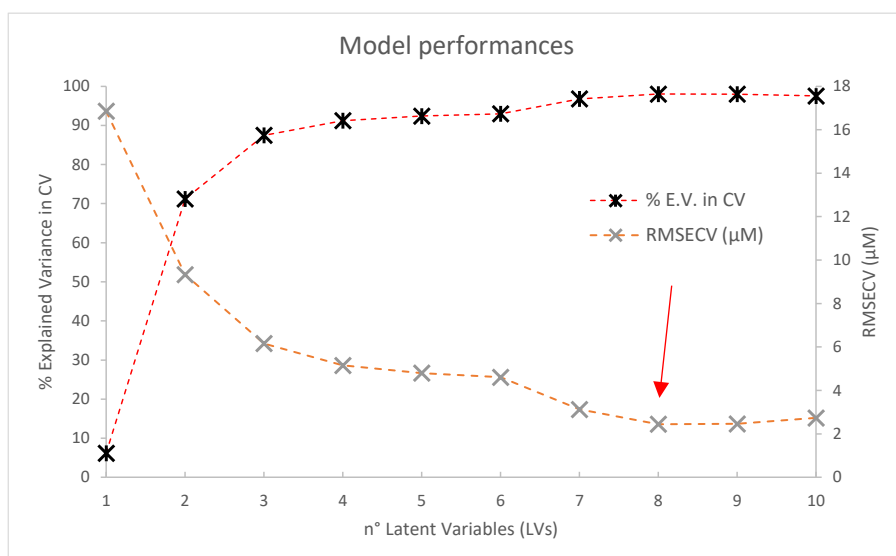

**Table S3.** PLS model Pd(II)/TazoC-PADs pH 5.5: Experimental and fitted data

| Training set |              | Test set     |              |
|--------------|--------------|--------------|--------------|
| Exp. [Pd] μM | Fit. [Pd] μM | Exp. [Pd] μM | Fit. [Pd] μM |
| 2.6          | 2.8          | 8.3          | 11.4         |
| 2.6          | 3.3          | 8.3          | 9.3          |
| 2.6          | 3.4          | 8.3          | 9.9          |
| 4.9          | 5.3          | 27.7         | 28.5         |
| 4.9          | 4.6          | 27.7         | 28.1         |
| 4.9          | 4.0          | 27.7         | 30.3         |
| 10.1         | 10.7         | 41.3         | 41.6         |
| 10.1         | 9.6          | 41.3         | 42.1         |
| 10.1         | 10.0         | 41.3         | 40.9         |
| 19.9         | 19.9         |              |              |
| 19.9         | 19.7         |              |              |
| 19.9         | 20.2         |              |              |
| 30.1         | 29.5         |              |              |
| 30.1         | 30.8         |              |              |
| 30.1         | 30.0         |              |              |
| 39.8         | 39.6         |              |              |
| 39.8         | 40.9         |              |              |
| 39.8         | 38.9         |              |              |
| 50.0         | 48.7         |              |              |
| 50.0         | 48.2         |              |              |
| 50.0         | 52.7         |              |              |

**Figure S4.** PLS model Pd(II)+Cu(II)/TazoC-PADs pH 4: Model performances

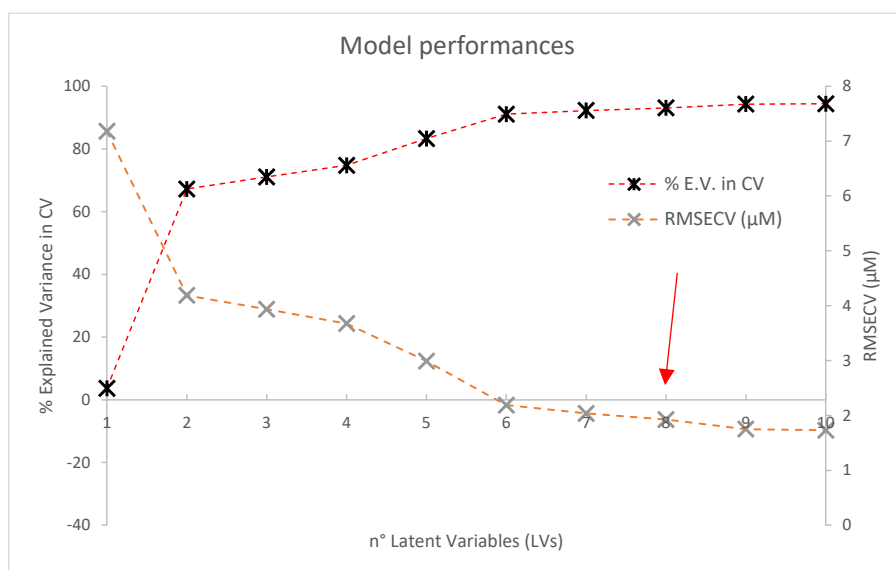

**Table S4.** PLS model Pd(II)+Cu(II)/TazoC-PADs pH 4: Experimental and fitted data

| Training set |              |              | Test set |              |              |
|--------------|--------------|--------------|----------|--------------|--------------|
| [Cu] μM      | Exp. [Pd] μM | Fit. [Pd] μM | [Cu] μM  | Exp. [Pd] μM | Fit. [Pd] μM |
| 5.0          | 0.0          | 0.6          | 20.5     | 3.8          | 3.9          |
| 10.1         | 0.0          | 0.6          | 0.0      | 3.8          | 3.8          |
| 20.5         | 0.0          | 0.5          | 20.5     | 7.5          | 7.3          |
| 0.0          | 5.0          | 3.6          | 0.0      | 7.5          | 7.7          |
| 5.0          | 5.0          | 4.5          | 5.0      | 15.0         | 15.8         |
| 10.1         | 5.0          | 4.5          | 10.1     | 15.0         | 14.9         |
| 0.0          | 10.3         | 10.6         | 3.8      | 3.8          | 3.6          |
| 10.1         | 10.3         | 11.8         | 14.9     | 3.8          | 4.5          |
| 5.0          | 19.7         | 19.2         | 3.8      | 7.5          | 7.9          |
| 10.1         | 19.7         | 19.4         | 14.9     | 7.5          | 6.9          |
| 20.5         | 19.7         | 19.9         | 3.8      | 15.0         | 15.3         |
| 3.8          | 0.0          | -0.4         |          |              |              |
| 14.9         | 0.0          | -0.2         |          |              |              |
| 3.8          | 0.0          | 0.6          |          |              |              |
| 7.6          | 5.0          | 4.5          |          |              |              |
| 14.9         | 5.0          | 5.3          |          |              |              |
| 7.6          | 5.0          | 5.3          |          |              |              |
| 14.9         | 10.3         | 11.0         |          |              |              |
| 0.0          | 10.3         | 10.8         |          |              |              |
| 5.0          | 10.3         | 11.0         |          |              |              |
| 10.1         | 10.3         | 10.4         |          |              |              |
| 20.5         | 19.7         | 19.4         |          |              |              |
| 5.0          | 19.7         | 18.7         |          |              |              |

**Figure S5.** PLS model Pd(II)+Cu(II)+Ni(II)/TazoC-PADs pH 5.5: Model performances

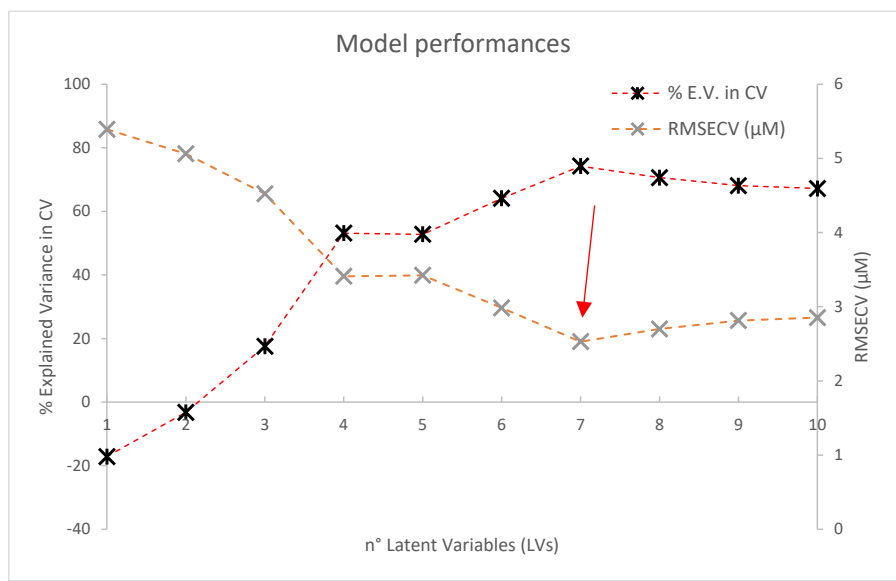

**Table S5.** PLS model Pd(II)+Cu(II)+Ni(II)/TazoC-PADs pH 5.5: Experimental and fitted data

| Training set |         |              |              | Test set |         |              |              |
|--------------|---------|--------------|--------------|----------|---------|--------------|--------------|
| [Cu] μM      | [Ni] μM | Exp. [Pd] μM | Fit. [Pd] μM | [Cu] μM  | [Ni] μM | Exp. [Pd] μM | Fit. [Pd] μM |
| 0.0          | 20.5    | 0.0          | -0.1         | 4.7      | 30.7    | 0.0          | -0.2         |
| 0.0          | 30.7    | 0.0          | -0.1         | 0.0      | 30.7    | 4.7          | 4.0          |
| 0.0          | 40.1    | 0.0          | 0.0          | 15.7     | 3.7     | 12.5         | 12.0         |
| 7.9          | 30.7    | 0.0          | 0.3          | 0.0      | 30.7    | 10.3         | 10.9         |
| 9.4          | 30.7    | 0.0          | -0.1         | 15.7     | 0.0     | 15.0         | 16.3         |
| 3.1          | 30.7    | 3.8          | 3.7          |          |         |              |              |
| 7.9          | 15.7    | 3.8          | 2.9          |          |         |              |              |
| 15.7         | 0.0     | 3.8          | 4.2          |          |         |              |              |
| 0.0          | 30.7    | 7.5          | 7.3          |          |         |              |              |
| 3.1          | 0.0     | 7.5          | 7.4          |          |         |              |              |
| 7.9          | 20.5    | 7.5          | 8.0          |          |         |              |              |
| 3.1          | 7.5     | 15.0         | 14.4         |          |         |              |              |
| 7.9          | 0.0     | 15.0         | 15.2         |          |         |              |              |

**Figure S6.** PLS model Pd(II)/TazoC-PADs TW: Model performances

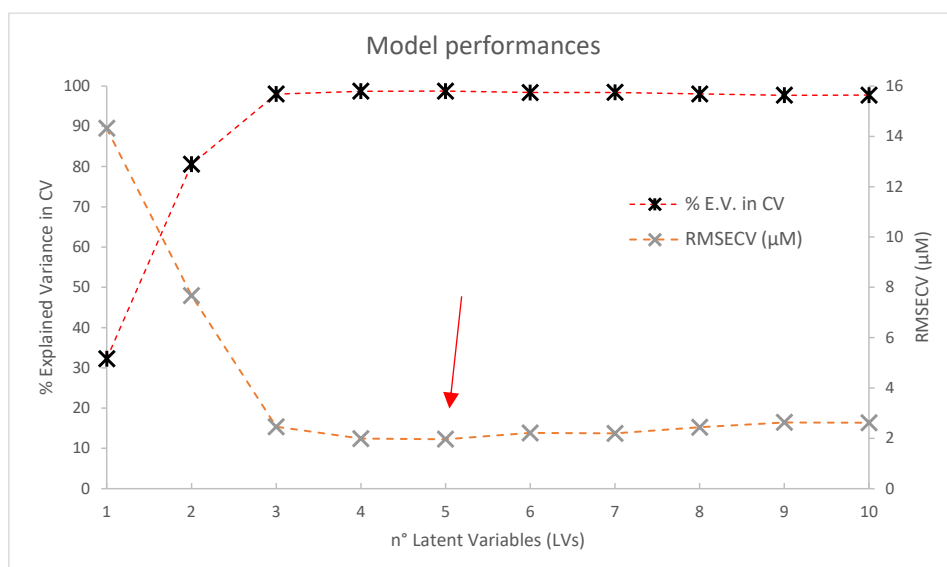

**Table S6.** PLS model Pd(II)/TazoC-PADs TW: Experimental and fitted data

| Training set |              | Test set     |              |
|--------------|--------------|--------------|--------------|
| Exp. [Pd] μM | Fit. [Pd] μM | Exp. [Pd] μM | Fit. [Pd] μM |
| 2.6          | 1.7          | 7.5          | 8.2          |
| 2.6          | 4.1          | 7.5          | 7.6          |
| 2.6          | 3.3          | 7.5          | 8.5          |
| 4.9          | 7.5          | 25.2         | 27.1         |
| 4.9          | 5.5          | 25.2         | 24.5         |
| 4.9          | 4.6          | 25.2         | 26.4         |
| 10.1         | 9.1          | 44.6         | 45.9         |
| 10.1         | 10.3         | 44.6         | 43.0         |
| 10.1         | 10.4         | 44.6         | 42.8         |
| 19.9         | 19.8         |              |              |
| 19.9         | 21.6         |              |              |
| 19.9         | 19.9         |              |              |
| 30.1         | 27.1         |              |              |
| 30.1         | 29.3         |              |              |
| 30.1         | 31.5         |              |              |
| 39.8         | 39.6         |              |              |
| 39.8         | 39.9         |              |              |
| 39.8         | 41.9         |              |              |
| 50.0         | 51.7         |              |              |
| 50.0         | 48.2         |              |              |
| 50.0         | 48.3         |              |              |
